1           **From proteins to polysaccharides: lifestyle and genetic evolution of**  
2                           ***Coprothermobacter proteolyticus*.**

3  
4  
5           **B.J. Kunath<sup>1#</sup>, F. Delogu<sup>1#</sup>, A.E. Naas<sup>1</sup>, M.Ø. Arntzen<sup>1</sup>, V.G.H. Eijsink<sup>1</sup>, B. Henrissat<sup>2</sup>, T.R.**  
6                           **Hvidsten<sup>1</sup>, P.B. Pope<sup>1\*</sup>**

- 7  
8    1.       Faculty of Chemistry, Biotechnology and Food Science, Norwegian University of Life  
9            Sciences, 1432 Ås, NORWAY.  
10   2.       Architecture et Fonction des Macromolécules Biologiques, CNRS, Aix-Marseille  
11            Université, F-13288 Marseille, France.

12   **# Equal contributors**

13  
14   **\*Corresponding Author:** Phillip B. Pope

15                           Faculty of Chemistry, Biotechnology and Food Science

16                           Norwegian University of Life Sciences

17                           Post Office Box 5003

18                           1432, Ås, Norway

19                           Phone: +47 6496 6232

20                           Email: [phil.pope@nmbu.no](mailto:phil.pope@nmbu.no)

21  
22  
23   **RUNNING TITLE:**

24   The genetic plasticity of *Coprothermobacter*

25  
26   **COMPETING INTERESTS**

27   The authors declare there are no competing financial interests in relation to the work described.

28  
29   **KEYWORDS**

30   CAZymes; Horizontal gene transfer; strain heterogeneity; Metatranscriptomics

31 **ABSTRACT**

32 Microbial communities that degrade lignocellulosic biomass are typified by high levels of  
33 species- and strain-level complexity as well as synergistic interactions between both  
34 cellulolytic and non-cellulolytic microorganisms. *Coprothermobacter proteolyticus*  
35 frequently dominates thermophilic, lignocellulose-degrading communities with wide  
36 geographical distribution, which is in contrast to reports that it ferments proteinaceous  
37 substrates and is incapable of polysaccharide hydrolysis. Here we deconvolute a highly  
38 efficient cellulose-degrading consortium (SEM1b) that is co-dominated by *Clostridium*  
39 (*Ruminiclostridium*) *thermocellum*- and multiple heterogenic strains affiliated to *C.*  
40 *proteolyticus*. Metagenomic analysis of SEM1b recovered metagenome-assembled genomes  
41 (MAGs) for each constituent population, whilst in parallel two novel strains of *C. proteolyticus*  
42 were successfully isolated and sequenced. Annotation of all *C. proteolyticus* genotypes (two  
43 strains and one MAG) revealed their genetic acquisition of carbohydrate-active enzymes  
44 (CAZymes), presumably derived from horizontal gene transfer (HGT) events involving  
45 polysaccharide-degrading Firmicutes or Thermotogae-affiliated populations that are  
46 historically co-located. HGT material included a saccharolytic operon, from which a CAZyme  
47 was biochemically characterized and demonstrated hydrolysis of multiple hemicellulose  
48 polysaccharides. Finally, temporal genome-resolved metatranscriptomic analysis of SEM1b  
49 revealed expression of *C. proteolyticus* CAZymes at different SEM1b life-stages as well as co-  
50 expression of CAZymes from multiple SEM1b populations, inferring deeper microbial  
51 interactions that are dedicated towards community degradation of cellulose and  
52 hemicellulose. We show that *C. proteolyticus*, a ubiquitous keystone population, consists of  
53 closely related strains that have adapted via HGT to presumably degrade both oligo- and  
54 longer polysaccharides present in decaying plants and microbial cell walls, thus explaining  
55 its dominance in thermophilic anaerobic digesters on a global scale.

## 56 INTRODUCTION

57 The anaerobic digestion of plant biomass profoundly shapes innumerable ecosystems,  
58 ranging from the gastrointestinal tracts of humans and other mammals to those that drive  
59 industrial applications such as biofuel generation. Biogas reactors are one of the most  
60 commonly studied anaerobic systems, yet many keystone microbial populations and their  
61 metabolic processes are poorly understood due to a lack of cultured or genome sampled  
62 representatives. *Coprothermobacter* spp. are frequently observed in high abundance in  
63 thermophilic anaerobic systems, where they are believed to exert strong protease activity  
64 whilst generating hydrogen and acetate, key intermediate metabolites for biogas production  
65 (Tandishabo et al 2012). Molecular techniques have shown that their levels range from 10  
66 to 90% of the total microbial community, irrespective of bioreactors being operated on  
67 lignocellulose- or protein-rich substrates (**Figure 1**). Despite their promiscuous distribution,  
68 global abundance and key role in biogas production, only two species have been described:  
69 *Coprothermobacter platensis* (Etchebehere et al 1998) and *Coprothermobacter proteolyticus*  
70 (Ollivier et al 1985). These two species and their inherent phenotypes have formed the  
71 predictive basis for the majority of *Coprothermobacter*-dominated systems described to  
72 date. Recent studies have illustrated that *C. proteolyticus* populations in anaerobic biogas  
73 reactors form cosmopolitan assemblages of closely related strains that are hitherto  
74 unresolved (Hagen et al 2017).

75  
76 Frequently in nature, microbial populations are composed of multiple strains with genetic  
77 heterogeneity (Kashtan et al 2014, Schloissnig et al 2013). Studies of strain-level populations  
78 have been predominately performed with the human microbiome and especially the gut  
79 microbiota (Bron et al 2012, Spanogiannopoulos et al 2016). The reasons for strain  
80 diversification and their coexistence remain largely unknown (Ellegaard and Engel 2016),  
81 however several mechanisms have been hypothesized, such as: micro-niche selection (Hunt  
82 et al 2008, Kashtan et al 2014), host selection (McLoughlin et al 2016), cross-feed  
83 interactions (Rosenzweig et al 1994, Zelezniak et al 2015) and phage selection (Rodriguez-  
84 Valera et al 2009). Studies of isolated strains have shown that isolates can differ in a  
85 multitude of ways, including virulence and drug resistance (Gill et al 2005, Sharon et al 2013,  
86 Solheim et al 2009), motility (Zunino et al 1994) and nutrient utilization (Siezen et al 2010).

87 Strain-level genomic variations typically consist of single-nucleotide variants (SNVs) as well  
88 as acquisition/loss of genomic elements such as genes, operons or plasmids via horizontal  
89 gene transfer (HGT) (Koskella and Vos 2015, Tettelin et al 2005, Treangen and Rocha 2011).  
90 Variability in gene content caused by HGT is typically attributed to phage-related genes and  
91 other genes of unknown function (Ochman et al 2000), and can give rise to ecological  
92 adaptation, niche differentiation and eventually speciation (Bendall et al 2016, Biller et al  
93 2015, Shapiro et al 2012). Although differences in genomic features can be accurately  
94 characterized in isolated strains, it has been difficult to capture such information using  
95 culture-independent approaches such as metagenomics. Advances in bioinformatics have  
96 improved taxonomic profiling of microbial communities from phylum to species level but it  
97 remains difficult to profile similar strains from metagenomes and compare them with the  
98 same level of resolution obtained by comparison of isolate genomes (Truong et al 2017).  
99 Since closely-related strains can also differ in gene expression (González-Torres et al 2015),  
100 being able to distinguish the expression profiles of individual strains in a broader ecological  
101 context is elemental to understanding the influence they exert towards the overall  
102 community function.

103  
104 In this study, a novel population of *C. proteolyticus* that included multiple closely related  
105 strains, was observed within a simplistic biogas-producing consortium enriched on cellulose  
106 (hereafter referred to as SEM1b). Using a combined metagenomic and culture-dependent  
107 approach, two strains and a metagenome-assembled genome (MAG) affiliated to *C.*  
108 *proteolyticus* were recovered and genetically compared to the only available type strain, *C.*  
109 *proteolyticus* DSM 5265 (Alexiev et al 2014). Notable genomic differences included the  
110 acquisition of an operon (region-A) encoding carbohydrate-active enzymes (CAZymes),  
111 which inferred that *C. proteolyticus* has adapted to take advantage of longer polysaccharides.  
112 Enzymology was used to further support our hypothesis that the CAZymes within region-A  
113 are functionally active. We further examined the saccharolytic potential of our recovered *C.*  
114 *proteolyticus* population in a broader community context, by examining genome-resolved  
115 temporal metatranscriptomic data generated from the SEM1b consortium. Collective  
116 analysis highlighted the time-specific polysaccharide-degrading activity that *C. proteolyticus*  
117 exerts in a cellulolytic microbial community.

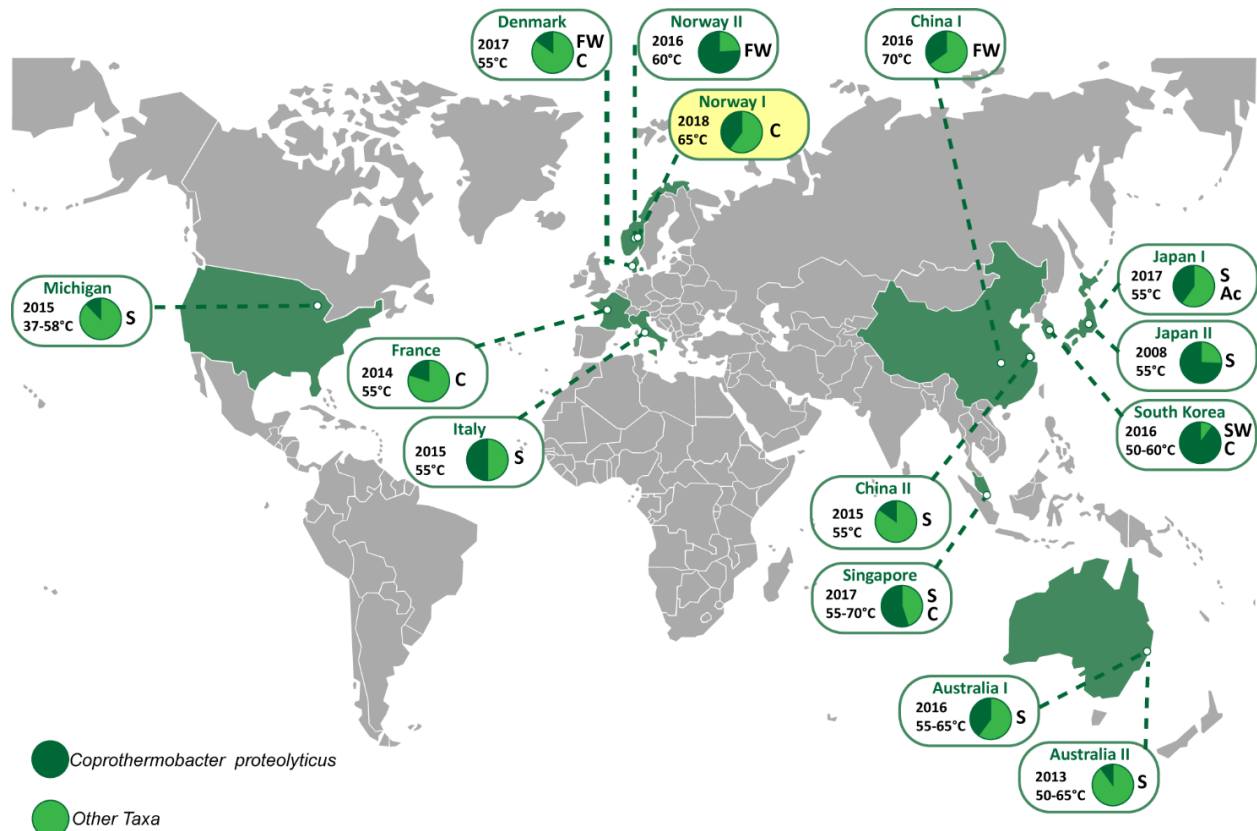

118

119 **Figure 1. Global distribution of *Coprothermobacter proteolyticus*-affiliated populations in anaerobic**  
120 **biogas reactors.** Charts indicate relative 16S rRNA gene abundance of OTUs affiliated to *C. proteolyticus* (dark  
121 green), in comparison to the total community (light green). The year of publication, reactor temperature and  
122 substrate (C: cellulose, FW: food waste, S: sludge, SW: Seaweed, Ac: acetate) is indicated (details in **Table S1**).  
123 The SEM1b consortium analyzed in this study is highlighted in yellow.

124

## 125 MATERIALS AND METHODS

### 126 Origin of samples and generation of the SEM1b consortium

127 An inoculum (100µl) was collected from a lab-scale biogas reactor (Reactor TD) fed with  
128 manure and food waste and run at 55°C. The TD reactor originated itself from a thermophilic  
129 (60°C) biogas plant (Frevar) fed with food waste and manure in Fredrikstad, Norway. Our  
130 research groups have previously studied the microbial communities in both the Frevar plant  
131 (Hagen et al 2017) and the TD bioreactor (Zamanzadeh et al 2016), which provided a  
132 detailed understanding of the original microbial community. The inoculum was transferred  
133 for serial dilution and enrichment to an anaerobic serum bottle and containing the rich ATCC  
134 medium 1943, with cellobiose substituted for 10g/L of cellulose in the form of Borregaard

135 Advanced Lignin technology (BALI™) treated Norway spruce (Rødsrud et al 2012). Our  
136 enrichment was incubated at 65°C with the lesser objective to study community biomass  
137 conversion at the upper temperature limits of methanogenesis. After an initial growth cycle,  
138 an aliquot was removed and used for a serial dilution to extinction experiment. Briefly, a  
139 100µl sample was transferred to a new 100ml bottle containing 60ml of anaerobic medium,  
140 mixed and 100µl was directly transferred again to a new one (six serial transfers in total).  
141 The consortium at maximum dilution that retained the cellulose-degrading capability  
142 (SEM1b) was retained for the present work, and aliquots were stored at – 80°C with glycerol  
143 (15% v/v). In parallel, continuous SEM1b cultures were maintained via regular transfers  
144 into fresh media (each recultivation incubated for ~2-3 days).

145

#### 146 **Metagenomic analysis**

147 Two different samples (D1B and D2B) were taken from a continuous SEM1b culture and  
148 were used for shotgun metagenomic analysis. D2B was 15 recultivations older than D1B and  
149 was used to leverage improvements in metagenome assembly and binning. From 6ml of  
150 culture, cells were pelleted by centrifugation at 14000 x *g* for 5 minutes and were kept frozen  
151 at -20°C until processing. Non-invasive DNA extraction methods were used to extract high  
152 molecular weight DNA as previously described (Kunath et al 2017). The DNA was quantified  
153 using a Qubit™ fluorimeter and the Quant-iT™ dsDNA BR Assay Kit (Invitrogen, USA) and the  
154 quality was assessed with a NanoDrop 2000 (Thermo Fisher Scientific, USA).

155

156 16S rRNA gene analysis was performed on both D1B and D2B samples. The V3-V4 hyper-  
157 variable regions of bacterial and archaeal 16S rRNA genes were amplified using the  
158 341F/805R primer set: 5'-CCTACGGGNGCASCAG-3' / 5'-GACTACNVGGGTATCTAATCC-3'  
159 (Takahashi et al 2014). The PCR was performed as previously described (Zamanzadeh et al  
160 2016) and the sequencing library was prepared using Nextera XT Index kit according to  
161 Illumina's instructions for the MiSeq system (Illumina Inc.). MiSeq sequencing (2x300bp  
162 with paired-ends) was conducted using the MiSeq Reagent Kit v3. The reads were quality  
163 filtered (Phred ≥ Q20) and USEARCH61 (Edgar 2010) was used for detection and removal of  
164 chimeric sequences. Resulting sequences were clustered at 97% similarity into operational  
165 taxonomic units (OTUs) and taxonomically annotated with the

166 pick\_closed\_reference\_otus.py script from the QIIME v1.8.0 toolkit (Caporaso et al 2010)  
167 using the Greengenes database (gg\_13\_8). The resulting OTU table was corrected based on  
168 the predicted number of *rrs* operons for each taxon (Stoddard et al 2015).

169  
170 D1B and D2B were also subjected to metagenomic shotgun sequencing using the Illumina  
171 HiSeq3000 platform (Illumina Inc) at the Norwegian Sequencing Center (NSC, Oslo, Norway).  
172 Samples were prepared with the TrueSeq DNA PCR-free preparation, and sequenced with  
173 paired-ends (2x125bp) on four lanes (two lanes per sample). Quality trimming of the raw  
174 reads was performed using cutadapt (Martin 2011), removing all bases on the 3' end with a  
175 Phred score lower than 20 (if any present) and excluding all reads shorter than 100nt,  
176 followed by a quality filtering using the FASTX-Toolkit ([http://hannonlab.cshl.edu/fastx\\_to](http://hannonlab.cshl.edu/fastx_toolkit/)  
177 [olkit/](http://hannonlab.cshl.edu/fastx_toolkit/)). Reads with a minimum Phred score of 30 over 90% of the read length were retained.  
178 In addition, genomes from two isolated *C. proteolyticus* strains (see below) were used to  
179 decrease the data complexity and to improve the metagenomic assembly and binning. The  
180 quality-filtered metagenomic reads were mapped against the assembled strains using the  
181 BWA-MEM algorithm requiring 100% identity (Li 2013). Reads that mapped the strains  
182 were removed from the metagenomic data and the remaining reads were co-assembled  
183 using MetaSpades v3.10.0 (Nurk et al 2017) with default parameters and k-mer sizes of 21,  
184 33, 55 and 77. The subsequent contigs were binned with Metabat v0.26.3 (Kang et al 2015)  
185 in “very sensitive mode”, using the coverage information from D1B and D2B. The quality  
186 (completeness, contamination and strain heterogeneity) of the bins (hereafter referred to as  
187 MAGs) was assessed by CheckM v1.0.7 (Parks et al 2015) with default parameters.

188

### 189 **Isolation of *C. proteolyticus* strains**

190 Strains were isolated using the Hungate method (Hungate 1969). In brief: Hungate tubes  
191 were anaerobically prepared with the DSMZ medium 481 with and without agar (15g/L).  
192 Directly after being autoclaved, Hungate tubes containing agar were cooled down to 65°C  
193 and sodium sulfide nonahydrate was added. From the SEM1b culture used for D1B, 100µl  
194 were transferred to a new tube and mixed. From this new tube, 100µl was directly  
195 transferred to 10ml of fresh medium, mixed and transferred again (six transfers in total).



196 Tubes were then cooled to 60°C for the agar to solidify, and then kept at the same  
197 temperature. After growth, single colonies were picked and transferred to liquid medium.

198  
199 DNA was extracted using the aforementioned method for metagenomic DNA, with one  
200 amendment: extracted DNA was subsequently purified with DNeasy PowerClean Pro  
201 Cleanup Kit (Qiagen, USA) following manufacturer's instructions. To insure the purity of the  
202 *C. proteolyticus* colonies, visual confirmation was performed using light microscopy and long  
203 16S rRNA genes were amplified using the primers pair 27F/1492R (Schumann 1991): 5'-  
204 AGAGTTTGATCMTGGCTCAG-3' / 5'-TACGGYTACCTTGTTACGACTT-3' and sequenced using  
205 Sanger technology. The PCR consisted of an initial denaturation step at 94°C for 5 min and  
206 30 cycles of denaturation at 94°C for 1 min, annealing at 55°C for 1 min, and extension at  
207 72°C for 1 min, and a final elongation at 72°C for 10 min. PCR products were purified using  
208 the NucleoSpin Gel and PCR Clean-up kit (Macherey-Nagel, Germany) and sent to GATC  
209 Biotech for Sanger sequencing.

210  
211 The genomes of two isolated *C. proteolyticus* strains (hereafter referred to as *BWF2A* and  
212 *SW3C*) were sequenced at the Norwegian Sequencing Center (NSC, Oslo, Norway). Samples  
213 were prepared with the TrueSeq DNA PCR-free preparation and sequenced using paired-  
214 ends (2x300bp) on a MiSeq system (Illumina Inc). Quality trimming, filtering and assembly  
215 were performed as described in the aforementioned metagenomic assembly section. The  
216 raw reads were additionally mapped on assembled contigs using bowtie2 (-very-sensitive -  
217 X 1000 -I 350) and the coverage was retrieved for every nucleotide with samtools depth -a.  
218 All the contigs with an average coverage higher than 100 were selected and individually  
219 inspected for coverage discontinuity. All the contigs selected with the average coverage  
220 criterion (*BWF2A*: 11, *SW3C*: 13) look continuous in coverage and together with the  
221 Metagenome Assembled Genomes (MAGs), they were submitted to the Integrated Microbial  
222 Genomes and Microbiomes (IMG/M) system (Chen et al 2017) for genomic feature  
223 prediction and annotation (pipeline version 4.15.1). Resulting annotated open reading  
224 frames (ORFs) were retrieved, further annotated for carbohydrate-active enzymes  
225 (CAZymes) using the CAZy annotation pipeline (Lombard et al 2014), and subsequently used  
226 as a reference database for the metatranscriptomics (with exception of



227 glycosyltransferases). The genomes for both strains and MAGs corresponding to *C.*  
228 *proteolyticus* were compared to the reference genome from *C. proteolyticus* DSM 5265. Using  
229 the BRIG tool (Alikhan et al 2011) for mapping and visualization, the different genomes were  
230 mapped against their pan genome generated using Roary (Page et al 2015).

231

### 232 **Phylogenetic analysis**

233 A concatenated ribosomal protein phylogeny was performed on the MAGs and the isolated  
234 strains using 16 ribosomal proteins chosen as single-copy phylogenetic marker genes (Rpl2,  
235 3, 4, 5, 6, 14, 15, 16, 18, 22 and 24, and Rps3, 8, 10, 17 and 19) (Hug et al 2016). The dataset  
236 was augmented with metagenomic sequences retrieved from our previous research on the  
237 original FREVAR reactor (Hagen et al 2017) and with sequences from reference genomes  
238 identified during the 16S rRNA analysis. Each gene set was individually aligned using  
239 MUSCLE v3.8.31 (Edgar 2004) and then manually curated to remove end gaps and  
240 ambiguously aligned terminal regions. The curated alignments were concatenated and a  
241 maximum likelihood phylogeny was obtained using MEGA7 (Kumar et al 2016) with 1000  
242 bootstrap replicates. The radial tree was visualized using iTOL (Letunic and Bork 2016).  
243 Additionally, an average nucleotide identity (ANI) comparison was performed between each  
244 MAG and their closest relative using the ANI calculator (Rodriguez-R and Konstantinidis  
245 2016).

246

### 247 **Heterologous expression and purification of the GH16 enzyme**

248 The *Coprothermobacter proteolyticus* BWF2A Ga0187557\_1002 gene-sequence without  
249 predicted signal peptide (Petersen et al 2011) was cloned from isolated genomic DNA using  
250 the following primers; GH16\_Fwd: TTAAGAAGGAGATATACTATGCTCGGCGTGAATGTGATG-  
251 AATATAAGTGA; GH16\_rev: AATGGTGGTGATGATGGTGCGCCTCATTTTCAAGCTTGTATA-  
252 CACGGACATAATC, and cloned into the pNIC-CH plasmid in *E. coli* TOP10 by ligation-  
253 independent cloning (Aslanidis and de Jong 1990). The transformant's sequence was verified  
254 by sequencing before transformation into OneShot® *E. coli* BL21 Star™ cells (Thermo  
255 Fischer Scientific, Waltham, MA, USA) for expression, where 200ml Luria-broth containing  
256 50µg/ml kanamycin was inoculated with 2ml over-night culture and incubated at 37°C, 200  
257 rpm. Expression was induced when the culture reached an OD600 of 0.6, by addition of

258 isopropyl- $\beta$ -D-1-thiogalactopyranoside (IPTG). The culture was incubated at 22°C, 200rpm  
259 for 16 hours, before harvesting by centrifugation (5,000  $\times$  *g*, 10 minutes) and storage of the  
260 pellet at -80°C. The frozen pellet was transferred to 20mL buffer A (20mM Tris-HCL pH8.0,  
261 200mM NaCl, 5mM imidazole) containing 1X BugBuster (Merck Millipore, Berlington, MA,  
262 USA), and stirred for 20 minutes at room temperature to lyse the cells. Cell debris was  
263 removed by centrifugation (30,000  $\times$  *g*, 20 minutes), and the protein was purified by  
264 immobilized metal-ion chromatography using a 5ml HisTrap FF column (GE-Healthcare,  
265 Little Chalfont, United Kingdom) pre-equilibrated with buffer A. The protein was eluted  
266 using a linear gradient to Buffer B (Buffer A with 500mM imidazole). The purity of the eluted  
267 fractions were assessed by SDS-PAGE, and the imidazole was removed from the buffer by  
268 repeated concentration and dilution using a Vivaspin (Sartorius, Göttingen, Germany)  
269 concentrator with a 10kDa cutoff. The protein concentration was determined by measured  
270 A280 and the calculated extinction coefficient.

271

## 272 **Biochemical characterization of the GH16 enzyme**

273 Assays were performed in triplicate in 96-well plates, and contained 1mg/ml substrate,  
274 20mM BisTris, pH 5.8 (50°C), and 1 $\mu$ M enzyme in a volume of 100 $\mu$ l. The reactions were pre-  
275 heated to 50°C before addition of enzyme, and were sealed before incubation for 1 hour in a  
276 Thermomixer C incubator with heated lid (Eppendorf, Hamburg, Germany). The substrates  
277 used were: barley  $\beta$ -glucan, carboxymethyl-curdlan, carboxymethyl-pachyman, carob  
278 galactomannan, tamarind xyloglucan, wheat arabinoxylan, larch arabinogalactan (all from  
279 Megazyme, Bray, Co. Wicklow, Ireland), and laminarin from *Laminaria digitate* (Sigma-  
280 Aldrich, St. Louis, MO, USA). Reactions were stopped by addition of DNS reagent (100 $\mu$ l,  
281 10g/l 3,5-dinitrosalicylic acid, 300g/L Potassium sodium tartrate, 10g/L NaOH (Miller  
282 1959)for quantification, or NaOH to a final concentration of 0.1M for product analysis.  
283 Reducing ends were quantified against a standard curve of glucose, where reactions with  
284 DNS-reagent were incubated at 95°C for 20 minutes before cooling on ice, and the  
285 absorbance was measured at 540nm. For product analysis, the reactions containing NaOH  
286 were further diluted 1:10 in water, before analysis by high-performance anion-exchange  
287 chromatography with pulsed amperometric detection (HPAEC-PAD), using a Dionex ICS-  
288 3000 system with a CarboPac PA1 column (Sunnyvale, CA, USA). Oligosaccharides were

289 eluted using a multi-step gradient, going from 0.1M NaOH to 0.1M NaOH - 0.3M sodium  
290 acetate (NaOAc) over 35 minutes, to 0.1M NaOH - 1.0M NaOAc over 5 minutes, before going  
291 back to 0.1M NaOH over 1 minute, and reconditioning for 9 minutes at 0.1M NaOH.

292

### 293 **Temporal meta-omic analyses of SEM1b**

294 A “meta-omic” time series analysis was conducted over the lifetime span of the SEM1b  
295 consortium ( $\approx$ 45hours). A collection of 27 replicate bottles containing ATCC medium 1943  
296 with 10g/L of cellulose, were inoculated from the same SEM1b culture, and incubated at 65°C  
297 in parallel. For each sample time point, three culture-containing bottles were removed from  
298 the collection and processed in triplicate. Sampling occurred over nine time-points (at 0, 8,  
299 13, 18, 23, 28, 33, 38 and 43 hours) during the SEM1b life-cycle, and are hereafter referred  
300 as T0, T1, T2, T3, T4, T5, T6, T7 and T8, respectively. DNA for 16S rRNA gene analysis was  
301 extracted (as above) from T1 to T8 and kept at -20°C until amplification and sequencing, and  
302 the analysis was performed using the protocol described above. Due to low cell biomass at  
303 the initial growth stages, sampling for metatranscriptomics was performed from T2 to T8.  
304 Sample aliquots (6 ml) were treated with RNAProtect Bacteria Reagent (Qiagen, USA)  
305 following the manufacturer’s instructions and the treated cell pellets were kept at -80°C until  
306 RNA extraction.

307

308 In parallel, metadata measurements including cellulose degradation rate, monosaccharide  
309 production and protein concentration were performed over all the nine time points (T0-T8).  
310 For monosaccharide detection, 2 ml samples were taken in triplicates, centrifuged at 16000  
311  $\times g$  for 5 minutes and the supernatants were filtered with 0.2 $\mu$ m sterile filters and boiled for  
312 15 minutes before being stored at -20°C until processing. Solubilized sugars released during  
313 microbial hydrolysis were identified and quantified by high-performance anion exchange  
314 chromatography (HPAEC) with pulsed amperometric detection (PAD). A Dionex ICS3000  
315 system (Dionex, Sunnyvale, CA, USA) equipped with a CarboPac PA1 column (2  $\times$  250 mm;  
316 Dionex, Sunnyvale, CA, USA), and connected to a guard of the same type (2  $\times$  50 mm), was  
317 used. Separation of products was achieved using a flow rate of 0.25mL/min in a 30-minute  
318 isocratic run at 1mM KOH at 30°C. For quantification, peaks were compared to linear

319 standard curves generated with known concentrations of selected monosaccharides  
320 (glucose, xylose, mannose, arabinose and galactose) in the range of 0.001-0.1g/L.

321

322 Total proteins measurements were taken to estimate SEM1b growth rate. Proteins were  
323 extracted following a previously described method (Hagen et al 2017) with a few  
324 modifications. Briefly, 30ml culture aliquots were centrifuged at 500 x *g* for 5 minutes to  
325 remove the substrate and the supernatant was centrifuged at 9000 x *g* for 15 minutes to  
326 pellet the cells. Cell lysis was performed by resuspending the cells in 1ml of lysis buffer (50  
327 mM Tris-HCl, 0.1% (v/v) Triton X-100, 200 mM NaCl, 1 mM DTT, 2mM EDTA) and keeping  
328 them on ice for 30 minutes. Cells were disrupted in 3 x 60 second cycles using a FastPrep24  
329 (MP Biomedicals, USA) and the debris were removed by centrifugation at 16000 x *g* for 15  
330 minutes. Supernatants containing proteins were transferred into low bind protein tubes and  
331 the proteins were quantified using Bradford's method (Bradford 1976).

332

333 Because estimation of cellulose degradation requires analyzing the total content of a sample  
334 to be accurate, the measurements were performed on individual cultures that were prepared  
335 separately. A collection of 18 bottles (9 time points in duplicate) were prepared using the  
336 same inoculum described above, and grown in parallel with the 27-bottle collection used for  
337 the meta-omic analyses. For each time point, the entire sample was recovered, centrifuged  
338 at 5000 x *g* for 5 minutes and the supernatant was discarded. The resulting pellets were  
339 boiled under acidic conditions as previously described (Zhou et al 2014) and the dried  
340 weights, corresponding to the remaining cellulose, were measured.

341

342 mRNA extraction was performed in triplicate on time points T2 to T8, using previously  
343 described methods (Gifford et al 2011) with the following modifications in the processing of  
344 the RNA. The extraction of the mRNA included the addition of an *in vitro* transcribed RNA as  
345 an internal standard to estimate the number of transcripts in the natural sample compared  
346 with the number of transcripts sequenced. The standard was produced by the linearization  
347 of a pGem-3Z plasmid (Promega, USA) with Scal (Roche, Germany). The linear plasmid was  
348 purified with a phenol/chloroform/isoamyl alcohol extraction and digestion of the plasmid  
349 was assessed by agarose gel electrophoresis. The DNA fragment was transcribed into a 994nt

350 long RNA fragment with the Riboprobe *in vitro* Transcription System (Promega, USA)  
351 following the manufacturer's protocol. Residual DNA was removed using the Turbo DNA  
352 Free kit (Applied Biosystems, USA). The quantity and the size of the RNA standard was  
353 measured with a 2100 bioanalyzer instrument (Agilent).

354  
355 Total RNA was extracted using enzymatic lysis and mechanical disruption of the cells and  
356 purified with the RNeasy mini kit following the manufacturer's protocol (Protocol 2, Qiagen,  
357 USA). The RNA standard (25ng) was added at the beginning of the extraction in every  
358 sample. After purification, residual DNA was removed using the Turbo DNA Free kit, and free  
359 nucleotides and small RNAs such as tRNAs were cleaned off with a lithium chloride  
360 precipitation solution according to ThermoFisher Scientific's recommendations. To reduce  
361 the amount of rRNAs, samples were treated to enrich for mRNAs using the MICROBExpress  
362 kit (Applied Biosystems, USA). Successful rRNA depletion was confirmed by analyzing both  
363 pre- and post-treated samples on a 2100 bioanalyzer instrument. Enriched mRNA was  
364 amplified with the MessageAmp II-Bacteria Kit (Applied Biosystems, USA) following  
365 manufacturer's instruction and sent for sequencing at the Norwegian Sequencing Center  
366 (NSC, Oslo, Norway). Samples were subjected to the TruSeq stranded RNA sample  
367 preparation, which included the production of a cDNA library, and sequenced with paired-  
368 end technology (2x125bp) on one lane of a HiSeq 3000 system.

369  
370 RNA reads were assessed for overrepresented features (adapters/primers) using FastQC  
371 ([www.bioinformatics.babraham.ac.uk/projects/fastqc/](http://www.bioinformatics.babraham.ac.uk/projects/fastqc/)), and ends with detected features  
372 and/or a Phred score lower than 20 were trimmed using Trimmomatic v.0.36 (Bolger et al  
373 2014). Subsequently, a quality filtering was applied with an average Phred threshold of 30  
374 over a 10nt window and a minimum read length of 100nt. rRNA and tRNA were removed  
375 using SortMeRNA v.2.1b (Kopylova et al 2012). SortMeRNA was also used to isolate the reads  
376 originating from the pGem-3Z plasmid. These reads were mapped against the specific  
377 portion of the plasmid containing the Ampr gene using Bowtie2 (Langmead 2012) with  
378 default parameters and the number of reads per transcript was quantified. The remaining  
379 reads were pseudoaligned against the metagenomic dataset, augmented with the annotated  
380 strains, using Kallisto pseudo -pseudobam (Bray et al 2016). The resulting output was used

381 to generate mapping files with bam2hits, which were used for expression quantification with  
382 mmseq (Turro et al 2011). Of the 40046 ORFs identified from the assembled SEM1b  
383 metagenome and two *C. proteolyticus* strains, 17598 (44%) were not found to be expressed,  
384 whereas 21480 (54%) were expressed and could be reliably quantified due to unique hits  
385 (reads mapping unambiguously against one unique ORF) (**Figure S1A**). The remaining 968  
386 ORFs (2%) were expressed, but identified only with shared hits (reads mapping  
387 ambiguously against more than one ORF, resulting in an unreliable quantification of the  
388 expression of each ORF) (**Figure S1B**). Since having unique hits improves the expression  
389 estimation accuracy, the ORFs were grouped using mmseq in order to improve the precision  
390 of expression estimates, with only a small reduction in biological resolution (Turro et al  
391 2014). The process first collapses ORFs into homologous groups if they have 100% sequence  
392 identity and then further collapses ORFs (or expression groups) if they acquire unique hits  
393 as a group (**Figure S1C**). This process generated 39146 expression groups of which 38428  
394 (98%) were singletons (groups composed of single ORF) and 718 (2%) were groups  
395 containing more than one homologous ORF. From the initial 968 low-information ORFs, 661  
396 (68%) became part of an expression group containing unique hits, 77 (8%) became part of  
397 ambiguous group (no unique hits) and 230 (24%) remained singletons (without unique  
398 hits). All expression groups without unique hits were then excluded from the subsequent  
399 analysis. A total of 21480 singletons and 605 multiple homologous expression groups were  
400 reliably quantified between *BWF2A*, *SW3C* and the SEM1b metatranscriptome (**Figure S1C**).

401  
402 In order to normalize the expression estimates, sample sizes were calculated using added  
403 internal standards, as described previously (Gifford et al 2011). The number of reads  
404 mapping on the defined region of the internal standard molecule were calculated to be  
405  $4.8 \times 10^3 \pm 4.1 \times 10^3$  reads per sample out of  $6.2 \times 10^9$  molecules added. Using this  
406 information, the estimated number of transcript molecules per sample was computed to be  
407  $5.1 \times 10^{12} \pm 3.7 \times 10^{12}$  transcripts. The resulting estimates for the sample sizes were used  
408 to scale the expression estimates from mmseq collapse and to obtain absolute expression  
409 values. During initial screening the sample T7C (time point T7, replicate C) was identified as  
410 an outlier using principle component analysis (PCA) and removed from downstream  
411 analysis.



412  
413 The expression groups were clustered using hierarchical clustering with Euclidean distance.  
414 Clusters were identified using the Dynamic Tree Cut algorithm (Langfelder et al 2008) with  
415 hybrid mode, deepsplit=1 and minClusterSize=7. Eigengenes were computed for the clusters  
416 and clusters with a Pearson Correlation Coefficient (PCC) greater than 0.9 were merged. The  
417 MAG/strain enrichment of the clusters was assessed using the BiasedUrn R package. The p-  
418 values were corrected with the Benjamini-Hochberg procedure and the significance  
419 threshold was set to 0.05. Expression groups composed of multiple MAGs/strains were  
420 included in several enrichment tests.

421  
422 **RESULTS AND DISCUSSION**  
423 ***The SEM1b consortium is a simplistic community, co-dominated by Clostridium***  
424 ***thermocellum and heterogeneous C. proteolyticus strains***

425 Molecular analysis of a reproducible, cellulose-degrading and biogas-producing consortium  
426 (SEM1b) revealed a stable and simplistic population structure that contained approximately  
427 seven populations, several of which consisted of multiple strains (**Figure 2, Table S2-S3**).  
428 16S rRNA gene analysis showed that the SEM1b consortium was co-dominated by OTUs  
429 affiliated to the genera *Clostridium* (52%) and *Coprothermobacter* (41%), with closest  
430 representatives identified as *Clostridium (Ruminiclostridium) thermocellum*, an  
431 uncharacterized *Clostridium spp.* and three *Coprothermobacter* phylotypes (**Table S2**).  
432 Previous meta-omic analysis on the parent Frevar reactor, revealed a multitude of  
433 numerically dominant *C. proteolyticus* strains, which created significant assembly and  
434 binning related issues (Hagen et al 2017). In this study, multiple oligotypes of *C. proteolyticus*  
435 were also found (**Table S2**). We therefore sought to isolate and recover axenic  
436 representatives to complement our meta-omic approaches, and using traditional anaerobic  
437 isolation techniques, we were successful in recovering two novel axenic strains (hereafter  
438 referred to as *BWF2A* and *SW3C*). The genomes of *BWF2A* and *SW3C* were sequenced and  
439 assembled and subsequently incorporated into our metagenomic and metatranscriptomic  
440 analysis below.

441  
442



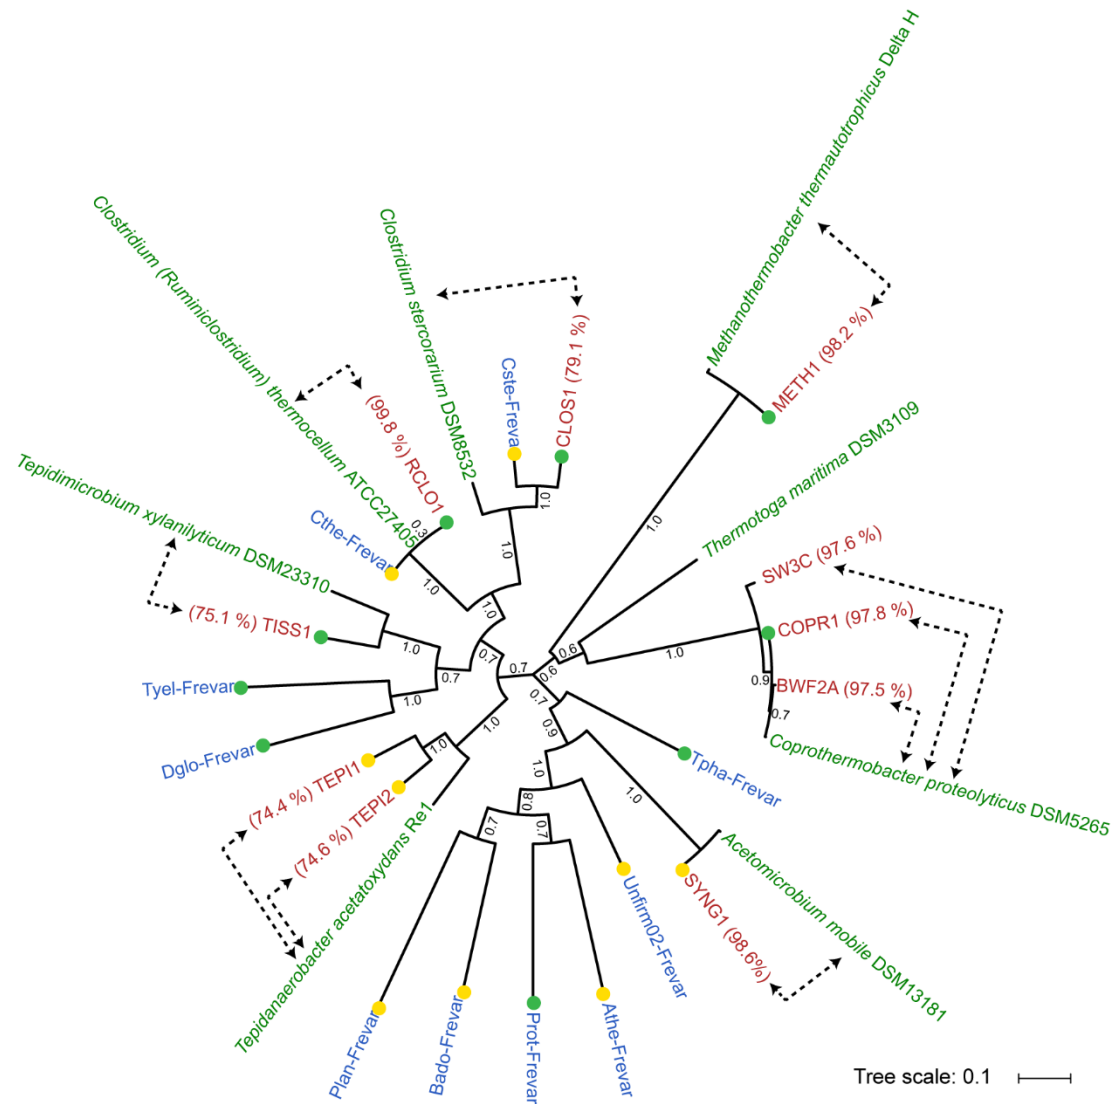

443  
444 **Figure 2. Phylogeny of *C. proteolyticus* strains and other MAGs recovered from the SEM1b consortium.**

445 Concatenated ribosomal protein tree of reference isolate genomes (green), MAGs from the previous Frevar  
446 study (blue, Hagen et al., 2017) and MAGs and isolate genomes recovered in this study (red). Average  
447 nucleotide identities (percentage indicated in parenthesis) were generated between SEM1b MAGs and their  
448 closest relative (indicated by dotted arrows). Bootstrap values are based on 1000 bootstrap replicates and the  
449 completeness of the MAGs are indicated by green (>90%) and yellow (>80%) colored dots.

450  
451 Shotgun metagenome sequencing of two SEM1b samples (D1B and D2B), generated 290Gb  
452 (502M paired-end reads) and 264Gb (457M paired-end reads) of data, respectively. Co-  
453 assembly of both datasets using strain-depleted reads with Metaspades produced 20760  
454 contigs totalizing 27Mbp with a maximum contig length of 603Kbp. Taxonomic binning

455 revealed 11 MAGs and a community structure similar to the one observed by 16S analysis  
456 (**Figure 2, Table S3**). A total of eight MAGs exhibited high completeness (> 80%) and a low  
457 level of contamination (< 10%). Three MAGs, COPR2, COPR3 and SYNG2 corresponded to  
458 small and incomplete MAGs, although Blastp analysis suggest COPR2 and COPR3 likely  
459 represent *Coprothermobacter*-affiliated strain elements.

460  
461 All near-complete MAGs (> 80%) as well as *BWF2A* and *SW3C* were phylogenetically  
462 compared against their closest relatives using average nucleotide identities (ANI) and a  
463 phylogenomic tree was constructed via analysis of 16 concatenated ribosomal proteins  
464 (**Figure 2**). One MAG was observed to cluster together with *C. proteolyticus* DSM 5265 and  
465 the two strains *BWF2A* and *SW3C* and was defined as COPR1. Two MAGs (RCL01-CLOS1)  
466 clustered together within the *Clostridium*; RCL01 with the well-known *C. thermocellum*,  
467 whereas CLOS1 grouped together with another *Clostridium* MAG generated from the  
468 FREVAR dataset and the isolate *C. stercorarium* (ANI: 79.1%). Both RCL01 and CLOS1  
469 encoded broad plant polysaccharide degrading capabilities, containing 297 and 139  
470 carbohydrate-active enzymes (CAZymes), respectively (**Table S4**). RCL01 in particular  
471 encoded cellulolytic (e.g. glycosyl hydrolase (GH) families GH5, GH9, GH48) and cellulosomal  
472 features (dockerins and cohesins), whereas CLOS1 appears more specialized towards  
473 hemicellulose degradation (e.g. GH3, GH10, GH26, GH43, GH51, GH130). Surprisingly,  
474 several CAZymes were also identified in COPR1 (n=65) and both *BWF2A* (n=37) and *SW3C*  
475 (n=34) at levels higher than what has previously been observed in *C. proteolyticus* DSM 5265  
476 (n=29) (**Table S4**). Several MAGs were also affiliated with other known lineages associated  
477 with biogas processes, including *Tepidanaerobacter* (TEPI1-2), *Synergistales* (SYNG1-2),  
478 *Tissierellales* (TISS1) and *Methanothermobacter* (METH1).

#### 479 480 ***Novel strains of C. proteolyticus reveal acquisition of carbohydrate-active enzymes***

481 Genome annotation of COPR1, *BWF2A* and *SW3C* identified both insertions and deletions in  
482 comparison to the only available reference genome, sequenced from the type strain DSM  
483 5265 (**Figure 3**). Functional annotation showed that most of the genomic differences were  
484 sporadic and are predicted not to affect the metabolism of the strains. However, several  
485 notable differences were observed, which might represent a significant change in the

486 lifestyle of the isolates. Both isolated strains lost the genes encoding flagellar proteins,  
487 although it is debatable that these genes originally conferred mobility in the type strain, as it  
488 has been previously reported as non-motile (Kersters et al 1994, Ollivier et al 1985).  
489 Interestingly, both strains acquired extra CAZymes including a particular genomic region  
490 that encoded a cluster of three CAZymes: GH16, GH3 and GH18-CBM35 (region-A, **Figure 3**).  
491 The putative function of these GHs, suggests that both *BWF2A* and *SW3C* are capable of  
492 hydrolyzing various beta-glucan linkages that are found in different hemicellulosic  
493 substrates (GH16: endo- $\beta$ -1,3-1,4-glucanase; GH3:  $\beta$ -glucosidase). Regarding the putative  
494 GH18 encoded in both strains, it could play a role in bacterial cell wall recycling (Johnson et  
495 al 2013) as an endo- $\beta$ -N-acetylglucosaminidase. Indeed, *C. proteolyticus* has previously been  
496 considered to be a scavenger of dead cells, even though this feature was mainly highlighted  
497 in term of proteolytic activities (Lü et al 2014).

498  
499 Taking a closer look, the region-A of CAZymes (GH16, GH3, GH18-CBM35) in *BWF2A* and  
500 *SW3C* was located on the same chromosomal cassette but organized onto two different  
501 operons with opposite directions (**Figure 4**). Comparison of the genes and their  
502 organization, revealed a high percentage of gene similarity and synteny with genome  
503 representatives from both phyla Firmicutes (*Thermoanaerobacter*, *Clostridium*  
504 *cellulolyticum* and *C. thermocellum*) and Thermotogae (*Thermosipho africanus*,  
505 *Fervidobacterium nodosum* and *F. gondwanense*). Both *C. thermocellum* and *Fervidobacterium*  
506 populations were previously identified in the original Frevar reactor (Hagen et al 2017).  
507 Moreover, a truncated contig from the Frevar metagenome (Scaffold  
508 Id:Ga0101770\_1036339) exhibited 99.9 % nucleotide identity to the *BWF2A* and *SW3C*  
509 genomes spanning 4.7 Kb across the CAZymes and genomic sections from both phyla (**Figure**  
510 **4**), suggesting the acquirement of region-A preceded the SEM1b enrichment.



523 Firmicutes-lineages encoded the same prophage together with an additional terminase,  
524 phage-capsid like proteins and more phage-related components on the 5' region (**Figure 4**).  
525 Because of the high sequence homology and the presence of phage-genes in the surrounding,  
526 we hypothesized that the origin of region-A in *BWF2A* and *SW3C*, is the result of phage-  
527 mediated HGT. Most likely, the operon from Firmicutes-affiliated lineages (e.g.  
528 *Thermoanaerobacter* and *C. thermocellum*) was transferred first due to the presence of its  
529 complete phage and generated a hot spot for further HGT for the GH16-GH3 encoding operon  
530 originating from Thermotogae-affiliated lineages (**Figure 4**). Interestingly, *T. africanus* also  
531 encoded a syntenous region that covered Region-A in both *BWF2A* and *SW3C* almost in its  
532 entirety (**Figure 4**), creating an alternative possibility that vertical gene transfer may also  
533 have played a role towards the evolution of this operon in *Coprothermobacter*. Gene transfer  
534 within anaerobic digesters has been reported for antibiotic resistance genes (Miller et al  
535 2016), whereas HGT of CAZymes have been detected previously among gut microbiota  
536 (Hehemann et al 2010, Ricard et al 2006, Song et al 2016). Since many microbes express only  
537 a specific array of carbohydrate-degrading capabilities, bacteria that acquire CAZymes from  
538 gene transfer events may gain additional capacities and consequently, a selective growth  
539 advantage (Modi et al 2013).

540

541 In response to our discovery of *C. proteolyticus* CAZyme acquisition, we attempted to  
542 cultivate our axenic strains in minimal media containing only hemicellulosic substrates  
543 (pachyman, curdlan, barley beta-glucan) as a sole carbon source. However, no growth was  
544 observed for either *BWF2A* or *SW3C* in polysaccharide-supplemented media that was  
545 without yeast extract. These results were consistent with the few available studies on type  
546 strain DSM 5265, which have shown weak and slow growth on proteins and monomeric  
547 sugars, and only in the presence of pluralistic organic compounds found in yeast extract and  
548 rumen fluid (Kersters et al 1994, Ollivier et al 1985). Growth was observed in *BWF2A/SW3C*  
549 cultures with both yeast extract and polysaccharide substrates, however we detected no  
550 increased levels of growth, indicating that in isolation our *C. proteolyticus* strains may  
551 require specific undefined cofactor(s) or collaborative microbial partners to support the  
552 activity encoded by their acquired CAZymes.

553



554 In lieu of axenic *C. proteolyticus* cultivation data to support a saccharolytic lifestyle, we  
 555 biochemically interrogated the GH16 encoded in region-A (**Figure 4**). The catalytic domain  
 556 was synthesized and expressed in *Escherichia coli*, followed by protein purification. As  
 557 expected the GH16 demonstrated endoglucanase activity on  $\beta$ -1,3 (pachyman, curdlan,  
 558 laminarin) and  $\beta$ -1,3-1,4 (Barley) substrates (**Figure S2A**), which supports our hypothesis  
 559 that the CAZymes in region-A have transferred the ability of *BWF2A* or *SW3C* to degrade  
 560 polysaccharides. Against all  $\beta$ -glucan substrates, GH16 hydrolysis generated a large fraction  
 561 of glucose (**Figure S2B**), which has been shown to be readily fermented by *C. proteolyticus*  
 562 (Kerstens et al 1994, Ollivier et al 1985).

563

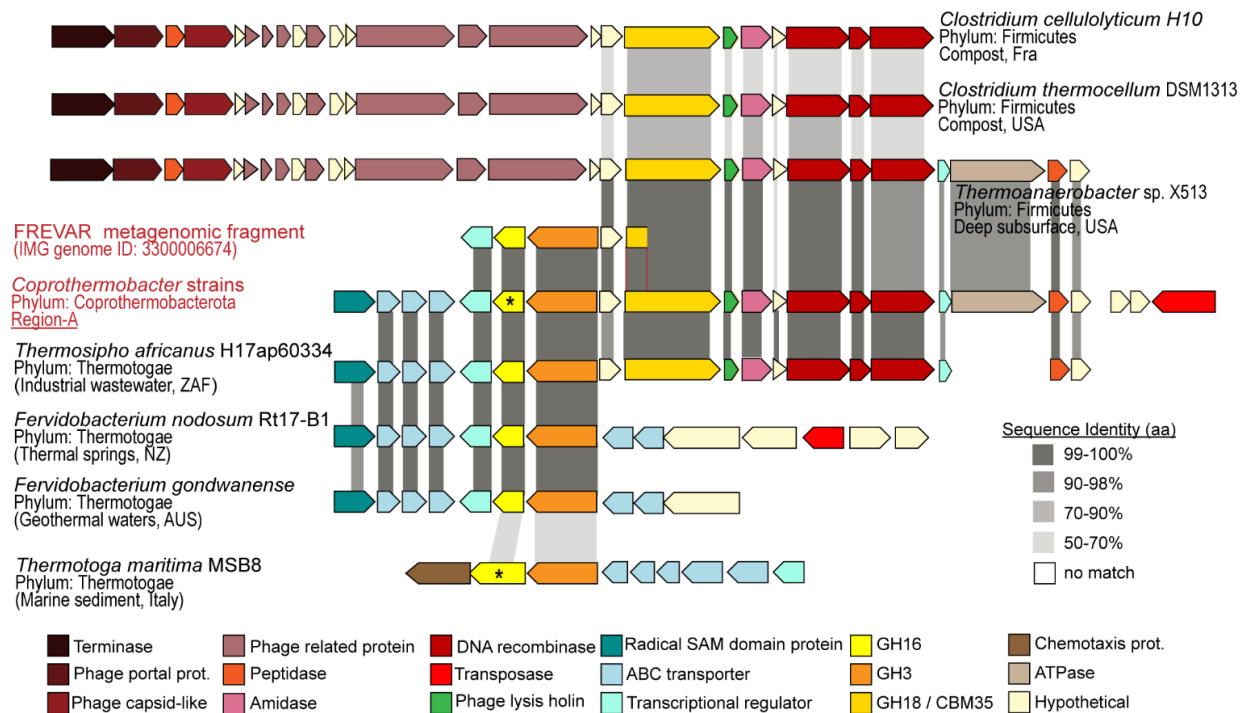

564

565 **Figure 4. Gene synteny of CAZymes within region-A encoded in *BWF2A* and *SW3C* genomes.** The gene  
 566 organization of CAZymes within region-A encoded in *BWF2A* and *SW3C* (see **Figure 3**), as well as highly similar  
 567 operons found in the original Frevar metagenome and isolated representatives from both phyla Firmicutes  
 568 (*Thermoanaerobacter*, *Clostridium cellulolyticum*, *C. thermocellum*) and Thermotogae (*Thermosipho africanus*,  
 569 *Fervidobacterium nodosum*, *F. gondwanense* and *Thermotoga maritima*). Grey shading between individual ORFs  
 570 indicates amino acid sequence identity calculated between each query ORF (Frevar metagenome and isolates)  
 571 and the reference ORF encoded in region-A from *BWF2A* and *SW3C* (identical in both strains). Asterisk denotes  
 572 biochemically characterized GH16 enzymes, including the *C. proteolyticus* representative from this study and a  
 573 laminarinase from *Thermotoga maritima* MSB8 that has previously been reported (Jeng et al 2011).

574 ***C. proteolyticus* expresses CAZymes and is implicit in collaborative polysaccharide**  
575 **degradation within the SEM1b consortium**

576 Whilst we confirmed that the acquired *C. proteolyticus* GH16 is functionally active, we also  
577 sought to better understand the role(s) played by it and other *C. proteolyticus* CAZymes in a  
578 saccharolytic consortium, by analyzing the temporal metatranscriptome of SEM1b over a  
579 complete life cycle. 16S rRNA gene analysis of eight time points (T1-8) over a 43hr period  
580 reaffirmed that *C. thermocellum*- and *C. proteolyticus*-affiliated populations dominate SEM1b  
581 over time (**Figure 5A**). Highly similar genes from different MAGs/genomes were grouped  
582 together in order to obtain “expression groups” with discernable expression profiles (see  
583 **Methods** and **Figure S1A/B**). A total of 274 singleton CAZyme expression groups and 8  
584 multiple ORF groups were collectively detected in the two *C. proteolyticus* strains and MAGs  
585 suspected of contributing to polysaccharide degradation (RCL01, CLOS1, COPR1-3, and  
586 TISS1, **Figure S1D, Table S5**). In several instances, expressed CAZymes from *BWF2A* and  
587 *SW3C* could not be resolved between the two strains and/or the COPR1 MAG. For example,  
588 all GHs within region-A could be identified as expressed by at least one of the isolated strains  
589 but could not be resolved further between the strains.

590  
591 From the CAZymes subset of expression groups, a cluster analysis was performed to reveal  
592 six expression clusters (I-VI, **Figure 5B**). Clusters II, III and IV were enriched with *C.*  
593 *proteolyticus*-affiliated MAGs and isolated strains. Clusters III and IV comprised of 10 and 11  
594 expression groups, respectively, and followed a similar profile over time (**Figure 5C**),  
595 increasing at earlier stages (T2-3) and again at later stationary/death stages (T6-8). Cluster  
596 II (10 expression groups) was slightly variant and increased more rapidly at T2 and  
597 sustained high levels over the course of SEM1b. All three clusters consisted of CAZymes  
598 targeting linkages associated with N-acetylglucosamine (CE9), and peptidoglycan (CE4,  
599 GH23, GH73), suggesting a role in bacterial cell wall hydrolysis (**Table S5**). This hypothesis  
600 was supported by 16S rRNA gene data, which illustrated that *C. proteolyticus*-affiliated  
601 populations (OTU2) were high at initial stages of the SEM1b life-cycle when cell debris was  
602 likely present in the inoculum that was sourced from the preceding culture at stationary  
603 phase (**Figure 5A**). At T2, the abundance of *C. thermocellum*-affiliated populations (OTU-1)  
604 was observed to outrank *C. proteolyticus* as the community predictably shifted to cellulose-



605 utilization. However, towards stationary phase (T6-8) when dead cell debris is expected to  
 606 be increasing, expression levels in clusters II, III and IV were maintained at high levels  
 607 (**Figure 5B**), which was consistent with high *C. proteolyticus* 16S rRNA gene abundance at  
 608 the same time-points.  
 609

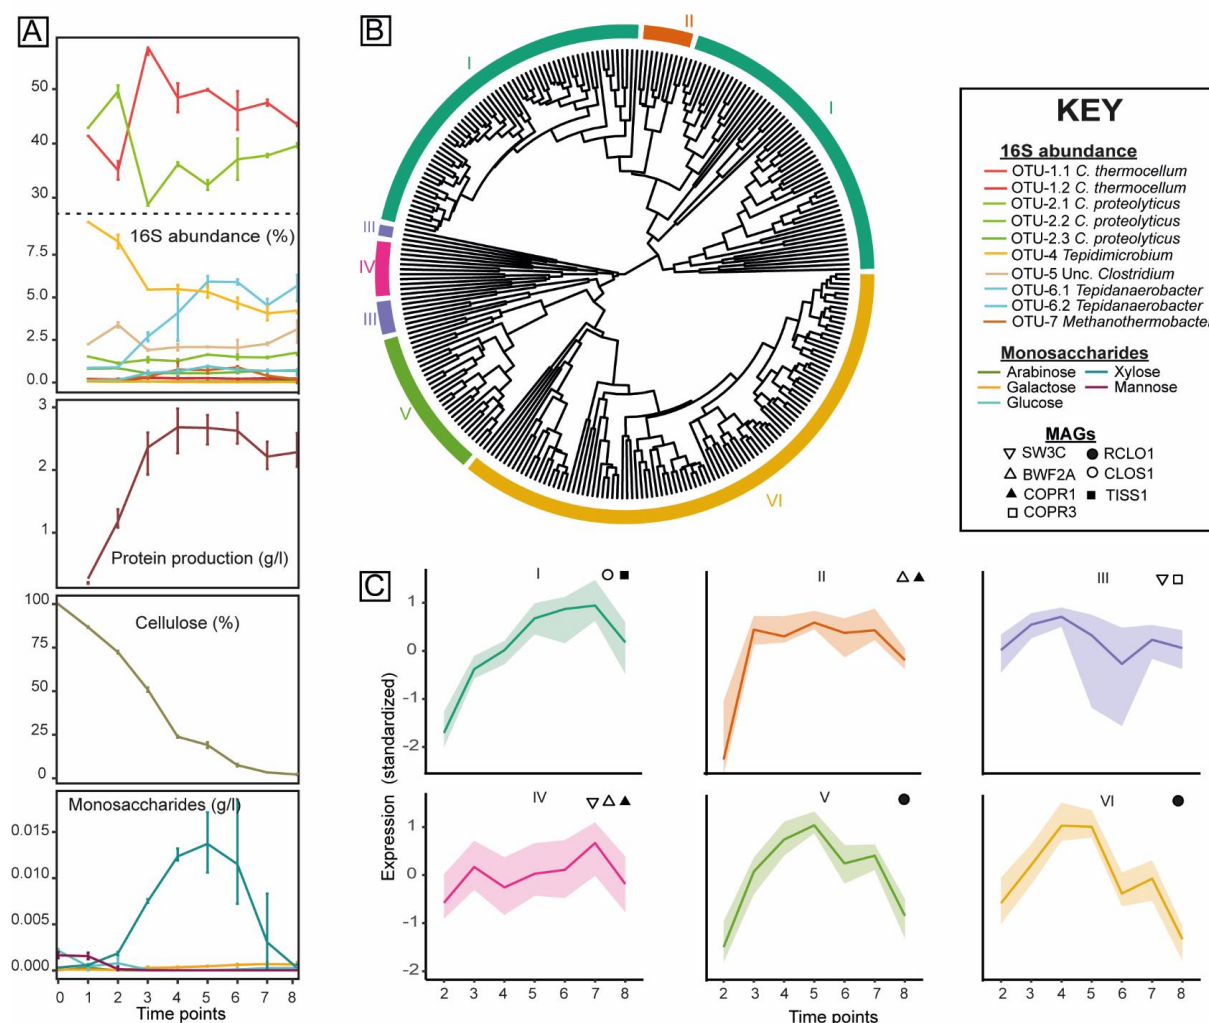

610  
 611 **Figure 5. Temporal meta-analysis of the SEM1b consortium.** (A) 16S rRNA gene amplicon and metadata  
 612 analysis was performed over a 43-hour period, which was segmented into 9 time-points. OTU IDs are detailed  
 613 in **Table S2**. Cellulose degradation rate, monosaccharide accumulation and growth rate (estimated by total  
 614 protein concentration) is presented. (B) Gene expression dendrogram and clustering of CAZymes from BWF2A,  
 615 SW3C and MAGs: RCLO1, CLOS1, COPR1-3, and TISS1. Six expression clusters (I-VI) are displayed in different  
 616 colors on the outer ring. (C) Clusters I-VI show characteristic behaviors over time summarized by the median  
 617 (solid line) and the shaded area between the first and third quartile of the standardized expression. Bacteria  
 618 that are statistically enriched (p-value < 0.05) in the clusters are displayed in the subpanels.

619 Clusters V and VI comprised 28 and 101 expression groups (respectively), and were enriched  
620 with the RCL01 MAG that was closely related to *C. thermocellum*. As expected, numerous  
621 expressed genes in cluster V and VI were inferred in cellulosome assembly (via dockerin  
622 domains) as well as cellulose (e.g. GH5, GH9, GH44, GH48, CBM3) and hemicellulose (e.g.  
623 GH10, GH11, GH26, GH43, GH74) hydrolysis (**Table S5**). Both clusters increased throughout  
624 the consortium's exponential phase (time points T1-4, **Figure 5A**), whilst 16S rRNA data also  
625 shows *C. thermocellum*-affiliated populations at high levels during the same stages (**Figure**  
626 **5A**).

627  
628 Cluster I was determined as the largest with 121 expression groups, and was particularly  
629 enriched with CLO1, which expressed many genes involved in hemicellulose  
630 deconstruction (e.g. GH3, GH10, GH29, GH31, GH43 and GH130) and carbohydrate  
631 deacetylation (e.g. CE4, CE7, CE8, CE9, CE12, CE15) (**Table S5**). CAZymes from both *BWF2A*  
632 and *SW3C* were also expressed in cluster I including the functionally active GH16 and GH3-  
633 encoding ORFs from region-A, which reaffirms our earlier predictions that certain *C.*  
634 *proteolyticus* populations in SEM1b are capable of degrading hemicellulosic substrates. The  
635 expression profile of cluster I over time was observed to slightly lag after cluster V and VI  
636 (**Figure 5**), suggesting that hemicellulases in cluster I genes are expressed once the  
637 hydrolytic effects of the RCL01-cellulosome (expressed in cluster V and VI) have liberated  
638 hemicellulosic substrates (Zverlov et al 2005b). Although *C. thermocellum* cannot readily  
639 utilize other carbohydrates besides glucose and longer glucans (Demain et al 2005), the  
640 cellulosome is composed of a number of hemicellulolytic enzymes such as GH10 and GH11  
641 endoxylanases, GH26 mannanases, GH74 xyloglucanases and GH43  
642 arabinanases/xylosidases (Zverlov et al 2005a), which are involved in the deconstruction of  
643 the underlying cellulose-hemicellulose matrix (Zverlov et al 2005b). Interestingly, RCL01  
644 representatives of GH10, GH11, GH5, GH9, GH16 and GH43 were all expressed in the  
645 additional RCL01-enriched cluster V and are presumably acting on the hemicellulose  
646 fraction present in the spruce-derived cellulose (Chylenski et al 2017). Furthermore,  
647 detection of hydrolysis products (**Figure 5A**), revealed that xylose increased significantly at  
648 T5-7, indicating that hemicellulosic polymers containing beta-1-4-xylan were likely available  
649 at these stages. Cluster V exhibited a similar profile to the other RCL01-enriched cluster

650 (Cluster VI), however its high expression levels were extended to T7, consistent with our  
651 observed levels of xylose release (**Figure 5C**)

652  
653 An additional GH16 from RCL01 was also expressed in SEM1b cluster V, which has 99.5 %  
654 amino acid sequence identity to Lic16A, a biochemically characterized endoglucanase that  
655 exerts specific  $\beta$ -1,3 activity similar to the *BWF2A/SW3C* GH16 that we report here. Notably,  
656 Lic16A is a cell wall anchored, non-cellulosomal CAZyme that is believed to enable *C.*  
657 *thermocellum* to grow exclusively on  $\beta$ -1,3-glucans (Fuchs et al 2003). All in all, the SEM1b  
658 expression data shows sequential community progression that co-ordinates putative  
659 hydrolysis of cellulose and hemicellulosic substrates as well as carbohydrates that are found  
660 in the microbial cell wall. In particular, *C. proteolyticus* populations in SEM1b were suspected  
661 to play key roles degrading microbial cell wall carbohydrates as well as hemicellulosic  
662 substrates, possibly in cooperation or in parallel to other clostridium populations at the later  
663 stages of the SEM1b growth cycle.

664

## 665 **CONCLUSIONS**

666 Unraveling the interactions occurring in a complex microbial community composed of  
667 closely related species or strains is an arduous task. Here, we have leveraged culturing  
668 techniques, metagenomics, time-resolved metatranscriptomics and enzymology to describe  
669 a novel *C. proteolyticus* population that is comprised of closely related strains that have  
670 acquired CAZymes via HGT and putatively evolved to incorporate a saccharolytic lifestyle.  
671 The co-expression patterns of *C. proteolyticus* CAZymes in clusters II, III and IV supports the  
672 adaptable role of this bacterium as a scavenger that is able to hydrolyze cell wall  
673 polysaccharides during initial phases of growth and in the stationary / death phase, when  
674 available sugars are low. Moreover, the acquisition of biochemically-verified hemicellulases  
675 by *C. proteolyticus*, and their co-expression in cluster I at time points when hemicellulose is  
676 available, further enhances its metabolic versatility and provides substantial evidence as to  
677 why this population dominates thermophilic reactors on a global scale, even when  
678 substrates are poor in protein.

679

## 680 **DATA AVAILABILITY**

681 All sequencing reads have been deposited in the sequence read archive (SRP134228), with  
682 specific numbers listed in **Table S6**. All microbial genomes are publicly available on JGI  
683 under the analysis project numbers listed in **Table S6**.

684

## 685 **ACKNOWLEDGEMENTS**

686 We are grateful for support from The Research Council of Norway (FRIPRO program, PBP:  
687 250479 / NorZymeD, VGHE: 221568), as well as the European Research Commission  
688 Starting Grant Fellowship (awarded to PBP; 336355 - MicroDE). The sequencing service was  
689 provided by the Norwegian Sequencing Centre ([www.sequencing.uio.no](http://www.sequencing.uio.no)), a national  
690 technology platform hosted by the University of Oslo and supported by the “Functional  
691 Genomics” and “Infrastructure” programs of the Research Council of Norway and the  
692 Southeastern Regional Health Authorities.

693

## 694 **COMPETING INTERESTS**

695 The authors declare there are no competing financial interests in relation to the work  
696 described.

697

## 698 **REFERENCES**

699 Alexiev A, Coil DA, Badger JH, Enticknap J, Ward N, Robb FT *et al* (2014). Complete Genome  
700 Sequence of Coprothermobacter proteolyticus DSM 5265. *Genome Announcements* **2**.

701

702 Alikhan NF, Petty NK, Ben Zakour NL, Beatson SA (2011). BLAST Ring Image Generator  
703 (BRIG): Simple prokaryote genome comparisons. *BMC Genomics* **12**.

704

705 Aslanidis C, de Jong PJ (1990). Ligation-independent cloning of PCR products (LIC-PCR).  
706 *Nucleic Acids Research* **18**: 6069-6074.

707

708 Bendall ML, Stevens SLR, Chan LK, Malfatti S, Schwientek P, Tremblay J *et al* (2016). Genome-  
709 wide selective sweeps and gene-specific sweeps in natural bacterial populations. *ISME*  
710 *Journal* **10**: 1589-1601.

711

712 Biller SJ, Berube PM, Lindell D, Chisholm SW (2015). Prochlorococcus: The structure and  
713 function of collective diversity. *Nature Reviews Microbiology* **13**: 13-27.

714

715 Bolger AM, Lohse M, Usadel B (2014). Trimmomatic: A flexible trimmer for Illumina  
716 sequence data. *Bioinformatics* **30**: 2114-2120.

717

- 718 Bradford MM (1976). A rapid and sensitive method for the quantitation of microgram  
719 quantities of protein utilizing the principle of protein-dye binding. *Analytical Biochemistry*  
720 **72**: 248-254.
- 721
- 722 Bray NL, Pimentel H, Melsted P, Pachter L (2016). Near-optimal probabilistic RNA-seq  
723 quantification. *Nature Biotechnology* **34**: 525-527.
- 724
- 725 Bron PA, Van Baarlen P, Kleerebezem M (2012). Emerging molecular insights into the  
726 interaction between probiotics and the host intestinal mucosa. *Nature Reviews Microbiology*  
727 **10**: 66-78.
- 728
- 729 Caporaso JG, Kuczynski J, Stombaugh J, Bittinger K, Bushman FD, Costello EK *et al* (2010).  
730 QIIME allows analysis of high-throughput community sequencing data. *Nature methods* **7**:  
731 335-336.
- 732
- 733 Chen IMA, Markowitz VM, Chu K, Palaniappan K, Szeto E, Pillay M *et al* (2017). IMG/M:  
734 Integrated genome and metagenome comparative data analysis system. *Nucleic Acids*  
735 *Research* **45**: D507-D516.
- 736
- 737 Chylenski P, Petrović DM, Müller G, Dahlström M, Bengtsson O, Lersch M *et al* (2017).  
738 Enzymatic degradation of sulfite-pulped softwoods and the role of LPMOs. *Biotechnology for*  
739 *Biofuels* **10**: 1-13.
- 740
- 741 Demain AL, Newcomb M, Wu JHD, Demain AL, Newcomb M, Wu JHD (2005). Cellulase,  
742 Clostridia, and Ethanol. *Microbiology and Molecular Biology Reviews* **69**: 124-154.
- 743
- 744 Edgar RC (2004). MUSCLE: Multiple sequence alignment with high accuracy and high  
745 throughput. *Nucleic Acids Research* **32**: 1792-1797.
- 746
- 747 Edgar RC (2010). Search and clustering orders of magnitude faster than BLAST.  
748 *Bioinformatics* **26**: 2460-2461.
- 749
- 750 Ellegaard KM, Engel P (2016). Beyond 16S rRNA community profiling: Intra-species  
751 diversity in the gut microbiota. *Frontiers in Microbiology* **7**: 1-16.
- 752
- 753 Etchebehere C, Pavan ME, Zorzópulos J, Soubes M, Muxí L (1998). Coprothermobacter  
754 platensis sp. nov., a new anaerobic proteolytic thermophilic bacterium isolated from an  
755 anaerobic mesophilic sludge. *International journal of systematic bacteriology* **48**: 1297-1304.
- 756
- 757 Fuchs K-P, Zverlov VV, Velikodvorskaya GA, Lottspeich F, Schwarz WH (2003). Lic16A of  
758 *Clostridium thermocellum*, a non-cellulosomal, highly complex endo- $\beta$ -1,3-glucanase bound  
759 to the outer cell surface. *Microbiology* **149**: 1021-1031.
- 760
- 761 Gifford SM, Sharma S, Rinta-Kanto JM, Moran MA (2011). Quantitative analysis of a deeply  
762 sequenced marine microbial metatranscriptome. *ISME Journal* **5**: 461-472.
- 763



- 764 Gill SR, Fouts DE, Archer GL, Mongodin EF, Deboy RT, Ravel J *et al* (2005). Insights on  
765 Evolution of Virulence and Resistance from the Complete Genome Analysis of an Early  
766 Methicillin-Resistant *Staphylococcus aureus* Strain and a Biofilm-Producing Methicillin-  
767 Resistant *Staphylococcus epidermidis* Strain. *J Bacteriol* **187**: 2426-2438.  
768
- 769 González-Torres P, Prysycz LP, Santos F, Martínez-García M, Gabaldón T, Antón J (2015).  
770 Interactions between Closely Related Bacterial Strains Are Revealed by Deep Transcriptome  
771 Sequencing. *Applied and Environmental Microbiology* **81**: 8445-8456.  
772
- 773 Hagen LH, Frank JA, Zamanzadeh M, Eijsink VGH, Pope PB, Horn SJ *et al* (2017). Quantitative  
774 metaproteomics highlight the metabolic contributions of uncultured phylotypes in a  
775 thermophilic anaerobic digester. *Applied and Environmental Microbiology* **83**.  
776
- 777 Hehemann JH, Correc G, Barbeyron T, Helbert W, Czjzek M, Michel G (2010). Transfer of  
778 carbohydrate-active enzymes from marine bacteria to Japanese gut microbiota. *Nature* **464**:  
779 908-912.  
780
- 781 Hug LA, Baker BJ, Anantharaman K, Brown CT, Probst AJ, Castelle CJ *et al* (2016). A new view  
782 of the tree of life. *Nature Microbiology* **1**: 1-6.  
783
- 784 Hungate RE (1969). Chapter IV A Roll Tube Method for Cultivation of Strict Anaerobes. In:  
785 Norris JR, Ribbons DWBTMiM (eds). *Methods in Microbiology*. Academic Press. pp 117-132.  
786
- 787 Hunt DE, David LA, Gevers D, Preheim SP, Alm EJ, Polz MF (2008). Resource Partitioning and  
788 Sympatric Differentiation Among Closely Related Bacterioplankton. *Science* **320**: 1081 LP-  
789 1085.  
790
- 791 Jeng W-Y, Wang N-C, Lin C-T, Shyur L-F, Wang AHJ (2011). Crystal Structures of the  
792 Laminarinase Catalytic Domain from *Thermotoga maritima* MSB8 in Complex with  
793 Inhibitors: essential residues for  $\beta$ -1,3 and  $\beta$ -1,4 glucan selection. *The Journal of Biological*  
794 *Chemistry* **286**: 45030-45040.  
795
- 796 Johnson JW, Fisher JF, Mobashery S (2013). Bacterial cell wall recycling. *Annals of the new*  
797 *york academy* **1277**: 54-75.  
798
- 799 Kang DD, Froula J, Egan R, Wang Z (2015). MetaBAT, an efficient tool for accurately  
800 reconstructing single genomes from complex microbial communities. *PeerJ* **3**: e1165-e1165.  
801
- 802 Kashtan N, Roggensack SE, Rodrigue S, Thompson JW, Biller SJ, Coe A *et al* (2014). Single-Cell  
803 Genomics Reveals Hundreds of coexisting subpopulations in wild *Prochlorococcus*. *Science*  
804 *(New York, NY)* **344**: 416-420.  
805
- 806 Kersters I, Maestrojuan GM, Torck U, Vancanneyt M, Kersters K, Verstraete W (1994).  
807 Isolation of *Coprothermobacter proteolyticus* from an Anaerobic Digest and Further  
808 Characterization of the Species. *Syst Appl Microbiol* **17**: 289-295.  
809

- 810 Kopylova E, Noé L, Touzet H (2012). SortMeRNA: Fast and accurate filtering of ribosomal  
811 RNAs in metatranscriptomic data. *Bioinformatics* **28**: 3211-3217.  
812
- 813 Koskella B, Vos M (2015). Adaptation in Natural Microbial Populations. *Annual Review of*  
814 *Ecology, Evolution, and Systematics* **46**: 503-522.  
815
- 816 Kumar S, Stecher G, Tamura K (2016). MEGA7: Molecular Evolutionary Genetics Analysis  
817 Version 7.0 for Bigger Datasets. *Molecular biology and evolution* **33**: 1870-1874.  
818
- 819 Kunath BJ, Bremges A, Weimann A, McHardy AC, Pope PB (2017). Metagenomics and  
820 CAZyme Discovery. In: Abbott DW, Lammerts van Bueren A (eds). *Protein-Carbohydrate*  
821 *Interactions: Methods and Protocols*. Springer New York: New York, NY. pp 255-277.  
822
- 823 Langfelder P, Zhang B, Horvath S (2008). Defining clusters from a hierarchical cluster tree:  
824 The Dynamic Tree Cut package for R. *Bioinformatics* **24**: 719-720.  
825
- 826 Langmead (2012). Fast gapped-read alignment with Bowtie 2. *Nature methods* **9**: 357-359.  
827
- 828 Letunic I, Bork P (2016). Interactive tree of life (iTOL) v3: an online tool for the display and  
829 annotation of phylogenetic and other trees. *Nucleic acids research* **44**: W242-W245.  
830
- 831 Li H (2013). Aligning sequence reads, clone sequences and assembly contigs with BWA-  
832 MEM. *arxiv* **00**: 1-3.  
833
- 834 Lombard V, Golaconda Ramulu H, Drula E, Coutinho PM, Henrissat B (2014). The  
835 carbohydrate-active enzymes database (CAZy) in 2013. *Nucleic Acids Research* **42**: D490-  
836 D495.  
837
- 838 Lü F, Bize A, Guillot A, Monnet V, Madigou C, Chapleur O *et al* (2014). Metaproteomics of  
839 cellulose methanisation under thermophilic conditions reveals a surprisingly high  
840 proteolytic activity. *ISME Journal* **8**: 88-102.  
841
- 842 Martin M (2011). Cutadapt removes adapter sequences from high-throughput sequencing  
843 reads. *EMBnetjournal* **17**: 10-10.  
844
- 845 McLoughlin K, Schluter J, Rakoff-Nahoum S, Smith AL, Foster KR (2016). Host Selection of  
846 Microbiota via Differential Adhesion. *Cell Host and Microbe* **19**: 550-559.  
847
- 848 Miller GL (1959). Use of Dinitrosalicylic Acid Reagent for Determination of Reducing Sugar.  
849 *Analytical Chemistry* **31**: 426-428.  
850
- 851 Miller JH, Novak JT, Knocke WR, Pruden A (2016). Survival of antibiotic resistant bacteria  
852 and horizontal gene transfer control antibiotic resistance gene content in anaerobic  
853 digesters. *Frontiers in Microbiology* **7**: 1-11.  
854



- 855 Modi SR, Lee HH, Spina CS, Collins JJ (2013). Antibiotic treatment expands the resistance  
856 reservoir and ecological network of the phage metagenome. *Nature* **499**: 219-222.  
857
- 858 Nurk S, Meleshko D, Korobeynikov A, Pevzner PA (2017). MetaSPAdes: A new versatile  
859 metagenomic assembler. *Genome Research* **27**: 824-834.  
860
- 861 Ochman H, Lawrence JG, Grolsman EA (2000). Lateral gene transfer and the nature of  
862 bacterial innovation. *Nature* **405**: 299-304.  
863
- 864 Ollivier BM, Mah Ra, Ferguson TJ, Boone DR, Garcia JL, Robinson R (1985). Emendation of  
865 the Genus *Thermobacteroides*: *Thermobacteroides proteolyticus* sp. nov., a proteolytic  
866 acetogen from a methanogenic enrichment. *International Journal of Systematic Bacteriology*  
867 **35**: 425-428.  
868
- 869 Page AJ, Cummins CA, Hunt M, Wong VK, Reuter S, Holden MTG *et al* (2015). Roary: Rapid  
870 large-scale prokaryote pan genome analysis. *Bioinformatics* **31**: 3691-3693.  
871
- 872 Parks DH, Imelfort M, Skennerton CT, Hugenholtz P, Tyson GW (2015). CheckM: Assessing  
873 the quality of microbial genomes recovered from isolates, single cells, and metagenomes.  
874 *Genome Research* **25**: 1043-1055.  
875
- 876 Petersen TN, Brunak S, von Heijne G, Nielsen H (2011). SignalP 4.0: discriminating signal  
877 peptides from transmembrane regions. *Nature Methods* **8**: 785.  
878
- 879 Ricard G, McEwan NR, Dutilh BE, Jouany JP, Macheboeuf D, Mitsumori M *et al* (2006).  
880 Horizontal gene transfer from bacteria to rumen ciliates indicates adaptation to their  
881 anaerobic, carbohydrates-rich environment. *BMC Genomics* **7**: 1-13.  
882
- 883 Rodriguez-R LM, Konstantinidis KT (2016). The enveomics collection: a toolbox for  
884 specialized analyses of microbial genomes and metagenomes. *PeerJ Preprints* **4**:  
885 e1900v1901.  
886
- 887 Rodriguez-Valera F, Martin-Cuadrado A-B, Rodriguez-Brito B, Pašić L, Thingstad TF, Rohwer  
888 F *et al* (2009). Explaining microbial population genomics through phage predation. *Nature*  
889 *Reviews Microbiology* **7**: 828-828.  
890
- 891 Rødsrud G, Lersch M, Sjöde A (2012). History and future of world's most advanced  
892 biorefinery in operation. *Biomass and Bioenergy* **46**: 46-59.  
893
- 894 Rosenzweig RF, Sharp RR, Treves DS, Adams J (1994). Microbial evolution in a simple  
895 unstructured environment: Genetic differentiation in *Escherichia coli*. *Genetics* **137**: 903-  
896 917.  
897
- 898 Schloissnig S, Arumugam M, Sunagawa S, Mitreva M, Tap J, Zhu A *et al* (2013). Genomic  
899 variation landscape of the human gut microbiome. *Nature* **493**: 45-50.  
900

- 901 Schumann P (1991). Nucleic Acid Techniques in Bacterial Systematics (Modern  
902 Microbiological Methods). *Journal of Basic Microbiology* **31**: 479-480.  
903
- 904 Shapiro BJ, Timberlake SC, Szabó G, Polz MF, Alm EJ (2012). Population Genomics of Early  
905 Differentiation of Bacteria. *Science* **336**: 48-51.  
906
- 907 Sharon I, Morowitz MJ, Thomas BC, Costello EK, Relman DA, Banfield JF (2013). Time series  
908 community genomics analysis reveals rapid shifts in bacterial species, strains, and phage  
909 during infant gut colonization. *Genome Research* **23**: 111-120.  
910
- 911 Siezen RJ, Tzeneva VA, Castioni A, Wels M, Phan HTK, Rademaker JLW *et al* (2010).  
912 Phenotypic and genomic diversity of *Lactobacillus plantarum* strains isolated from various  
913 environmental niches. *Environmental Microbiology* **12**: 758-773.  
914
- 915 Solheim M, Aakra Å, Snipen LG, Brede DA, Nes IF (2009). Comparative genomics of  
916 *Enterococcus faecalis* from healthy Norwegian infants. *BMC Genomics* **10**: 1-11.  
917
- 918 Song T, Xu H, Wei C, Jiang T, Qin S, Zhang W *et al* (2016). Horizontal Transfer of a Novel Soil  
919 Agarase Gene from Marine Bacteria to Soil Bacteria via Human Microbiota. *Scientific Reports*  
920 **6**: 1-10.  
921
- 922 Spanogiannopoulos P, Bess EN, Carmody RN, Turnbaugh PJ (2016). The microbial  
923 pharmacists within us: A metagenomic view of xenobiotic metabolism. *Nature Reviews*  
924 *Microbiology* **14**: 273-287.  
925
- 926 Stoddard SF, Smith BJ, Hein R, Roller BRK, Schmidt TM (2015). rrnDB: Improved tools for  
927 interpreting rRNA gene abundance in bacteria and archaea and a new foundation for future  
928 development. *Nucleic Acids Research* **43**: D593-D598.  
929
- 930 Takahashi S, Tomita J, Nishioka K, Hisada T, Nishijima M (2014). Development of a  
931 prokaryotic universal primer for simultaneous analysis of Bacteria and Archaea using next-  
932 generation sequencing. *PLoS ONE* **9**.  
933
- 934 Tandishabo K, Nakamura K, Umetsu K, Takamizawa K (2012). Distribution and role of  
935 *Coprothermobacter* spp. in anaerobic digesters. *Journal of Bioscience and Bioengineering*  
936 **114**: 518-520.  
937
- 938 Tettelin H, Massignani V, Cieslewicz MJ, Donati C, Medini D, Ward NL *et al* (2005). Genome  
939 analysis of multiple pathogenic isolates of *Streptococcus agalactiae*: Implications for the  
940 microbial "pan-genome". *Proceedings of the National Academy of Sciences* **102**: 13950-  
941 13955.  
942
- 943 Treangen TJ, Rocha EPC (2011). Horizontal transfer, not duplication, drives the expansion of  
944 protein families in prokaryotes. *PLoS Genetics* **7**.  
945

- 946 Truong DT, Tett A, Pasolli E, Huttenhower C, Segata N (2017). Microbial strain-level  
947 population structure & genetic diversity from metagenomes. *Genome Research* **27**: 626-638.  
948
- 949 Turro E, Su SY, Gonçalves Â, Coin LJM, Richardson S, Lewin A (2011). Haplotype and isoform  
950 specific expression estimation using multi-mapping RNA-seq reads. *Genome Biology* **12**: 1-  
951 15.  
952
- 953 Turro E, Astle WJ, Tavaré S (2014). Flexible analysis of RNA-seq data using mixed effects  
954 models. *Bioinformatics* **30**: 180-188.  
955
- 956 Zamanzadeh M, Hagen LH, Svensson K, Linjordet R, Horn SJ (2016). Anaerobic digestion of  
957 food waste - Effect of recirculation and temperature on performance and microbiology.  
958 *Water Research* **96**: 246-254.  
959
- 960 Zelezniak A, Andrejev S, Ponomarova O, Mende DR, Bork P, Patil KR (2015). Metabolic  
961 dependencies drive species co-occurrence in diverse microbial communities. *Proceedings of*  
962 *the National Academy of Sciences* **112**: 6449-6454.  
963
- 964 Zhou Y, Pope PB, Li S, Wen B, Tan F, Cheng S *et al* (2014). Omics-based interpretation of  
965 synergism in a soil-derived cellulose-degrading microbial community. *Scientific Reports* **4**: 1-  
966 6.  
967
- 968 Zunino P, Piccini C, Legnani-Fajardo C (1994). Flagellate and non-flagellate *Proteus mirabilis*  
969 in the development of experimental urinary tract infection. *Microbial Pathogenesis* **16**: 379-  
970 385.  
971
- 972 Zverlov VV, Kellermann J, Schwarz WH (2005a). Functional subgenomics of *Clostridium*  
973 *thermocellum* cellulosomal genes: Identification of the major catalytic components in the  
974 extracellular complex and detection of three new enzymes. *Proteomics* **5**: 3646-3653.  
975
- 976 Zverlov VV, Schantz N, Schmitt-Kopplin P, Schwarz WH (2005b). Two new major subunits in  
977 the cellulosome of *Clostridium thermocellum*: Xyloglucanase Xgh74A and endoxylanase  
978 Xyn10D. *Microbiology* **151**: 3395-3401.  
979
